# Supplementary material for: Seed Pretreatment and Foliar Application of Proline Regulate Morphological, Physio-Biochemical Processes and Activity of Antioxidant Enzymes in Plants of Two Cultivars of Quinoa (Chenopodium quinoa Willd.)
Source: PubMed Central journal article supplement (PMC6963800; doi:10.3390/plants8120588), 2019-12-10
Supplement: plants-08-00588-s001.pdf [file plants-08-00588-s001.pdf]

A

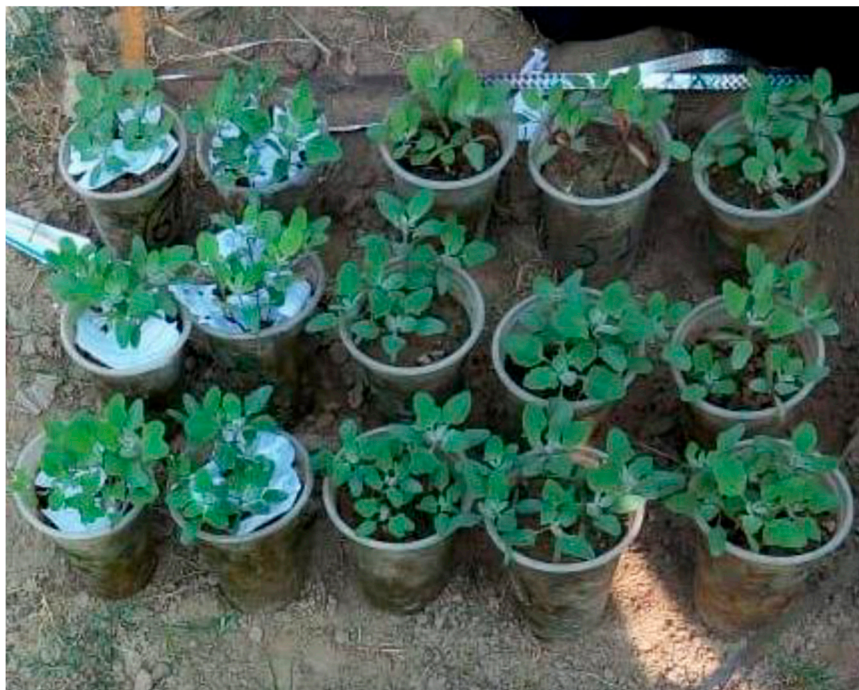

B

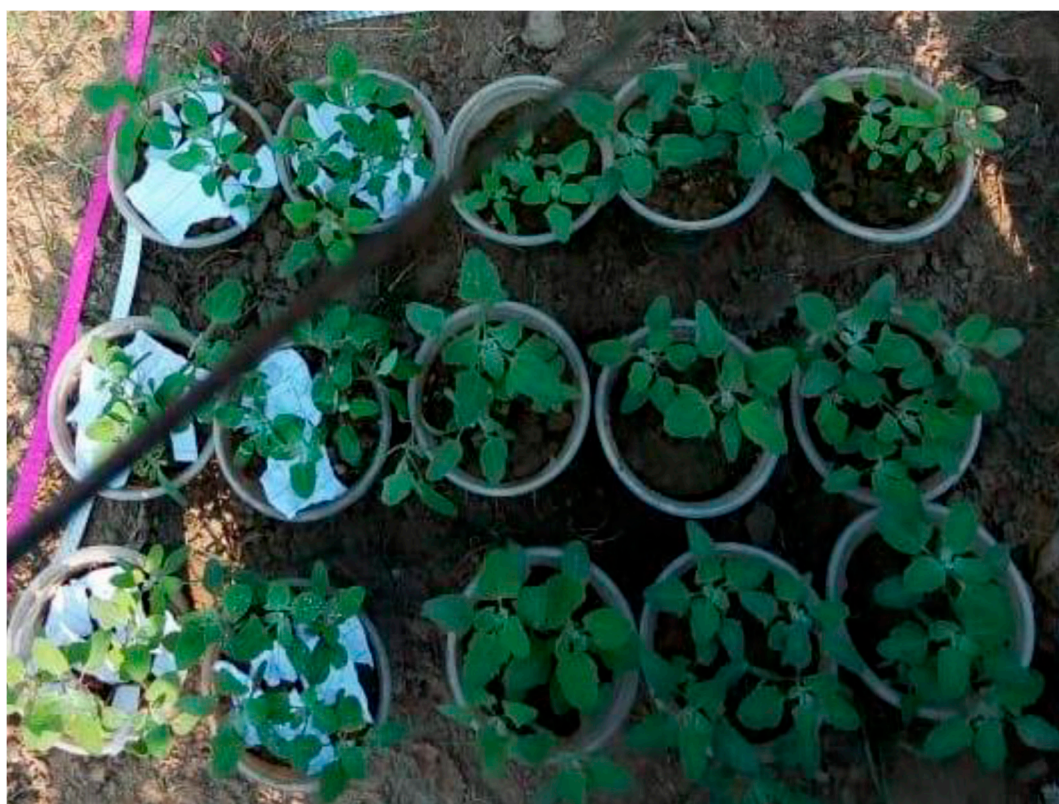

**Figure 4.** Overview of both quinoa cultivars V1 (A) and V2 (B) subjected to exogenously applied proline and cold stress conditions.
